# Supplementary material for: Rapid evolution of Mexican H7N3 highly pathogenic avian influenza viruses in poultry
Source: PLOS journal article supplement (doi:10.1371/journal.pone.0222457), 2019-09-12

Supplementary Figures 2. Time-scaled phylogenetic trees of the H7N3 HPAI and related wild bird viruses with bars to each node to display 95% HPD of the height

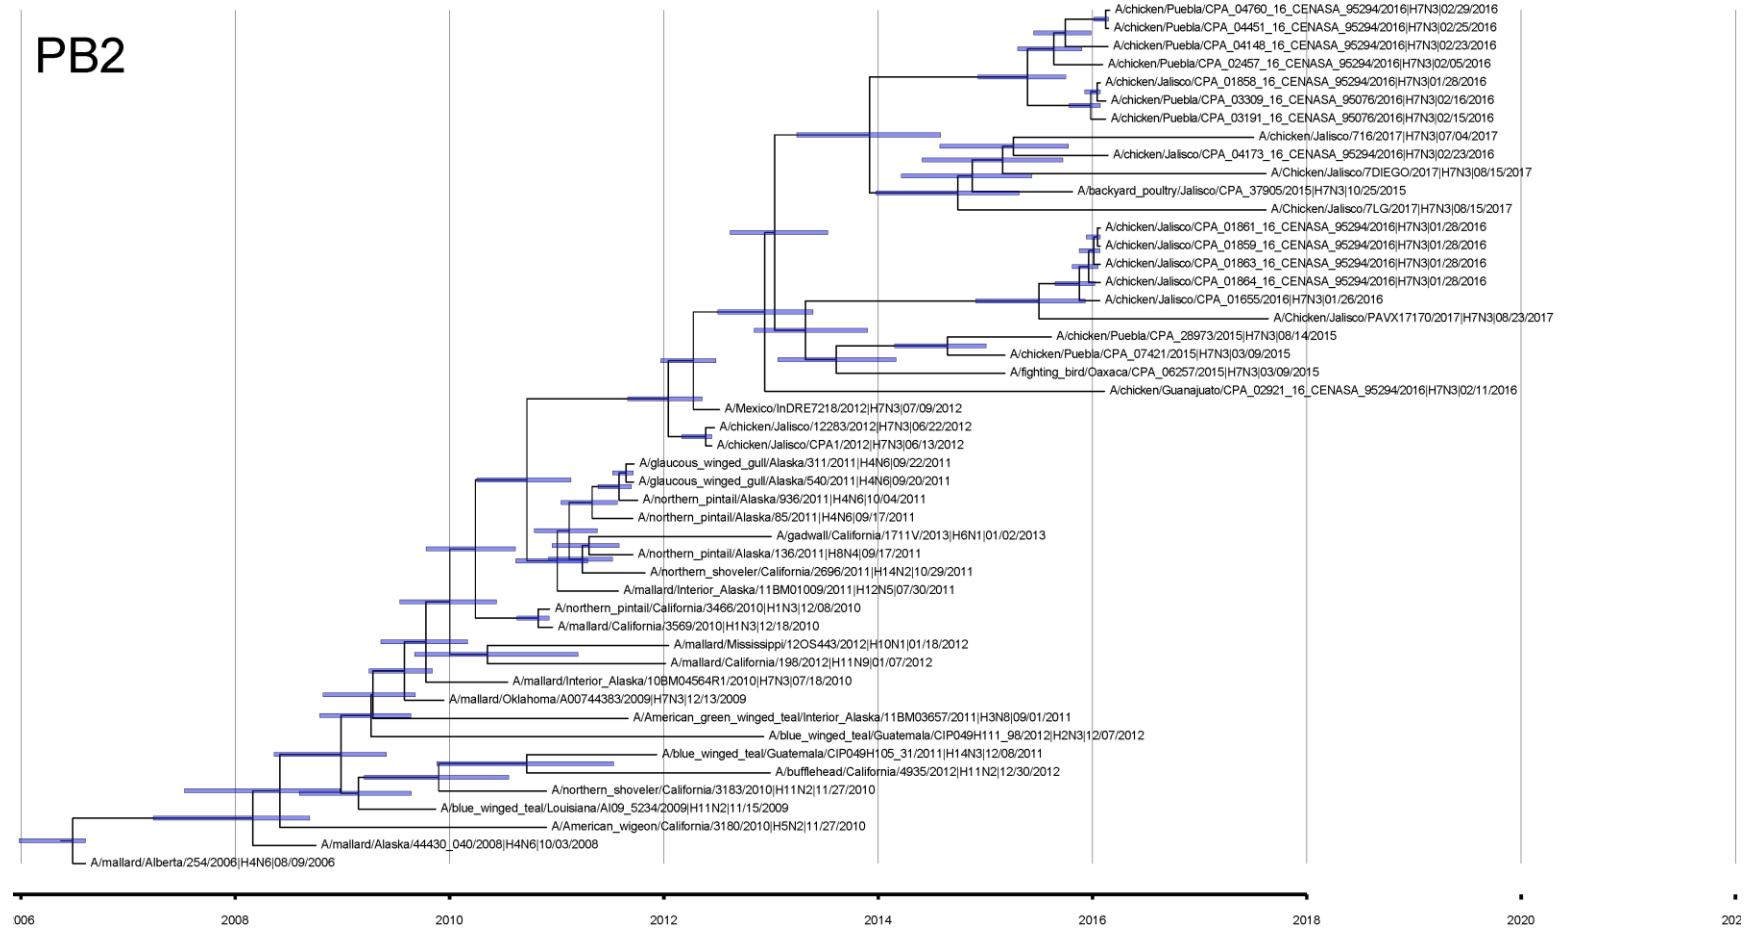

PB1

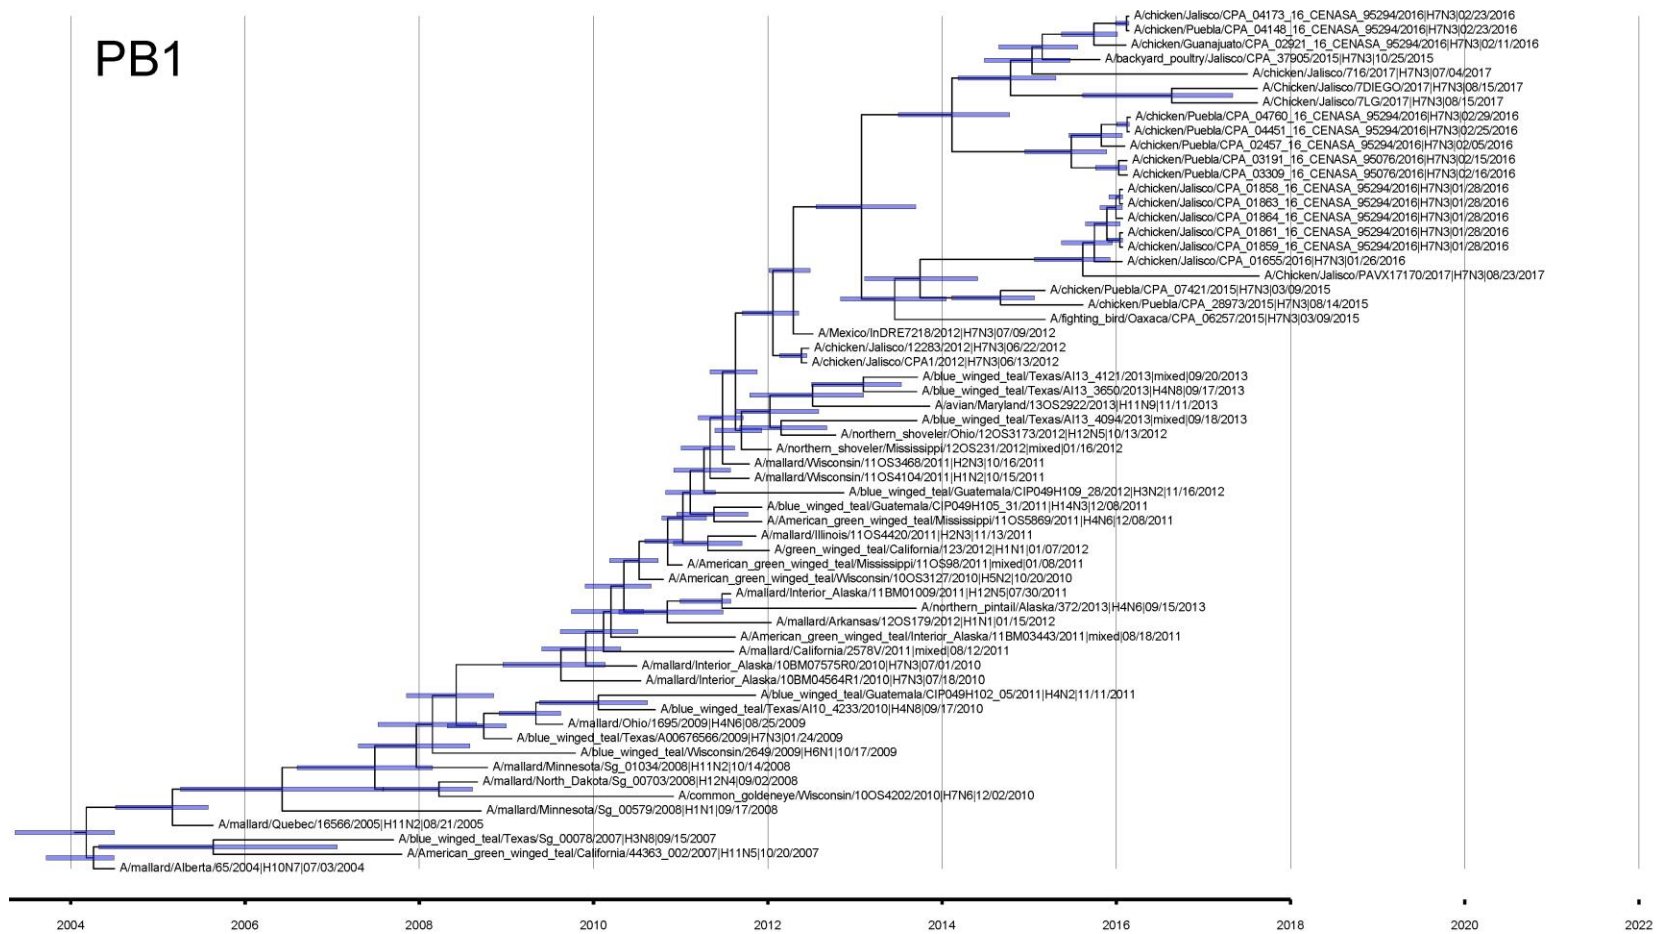

PA

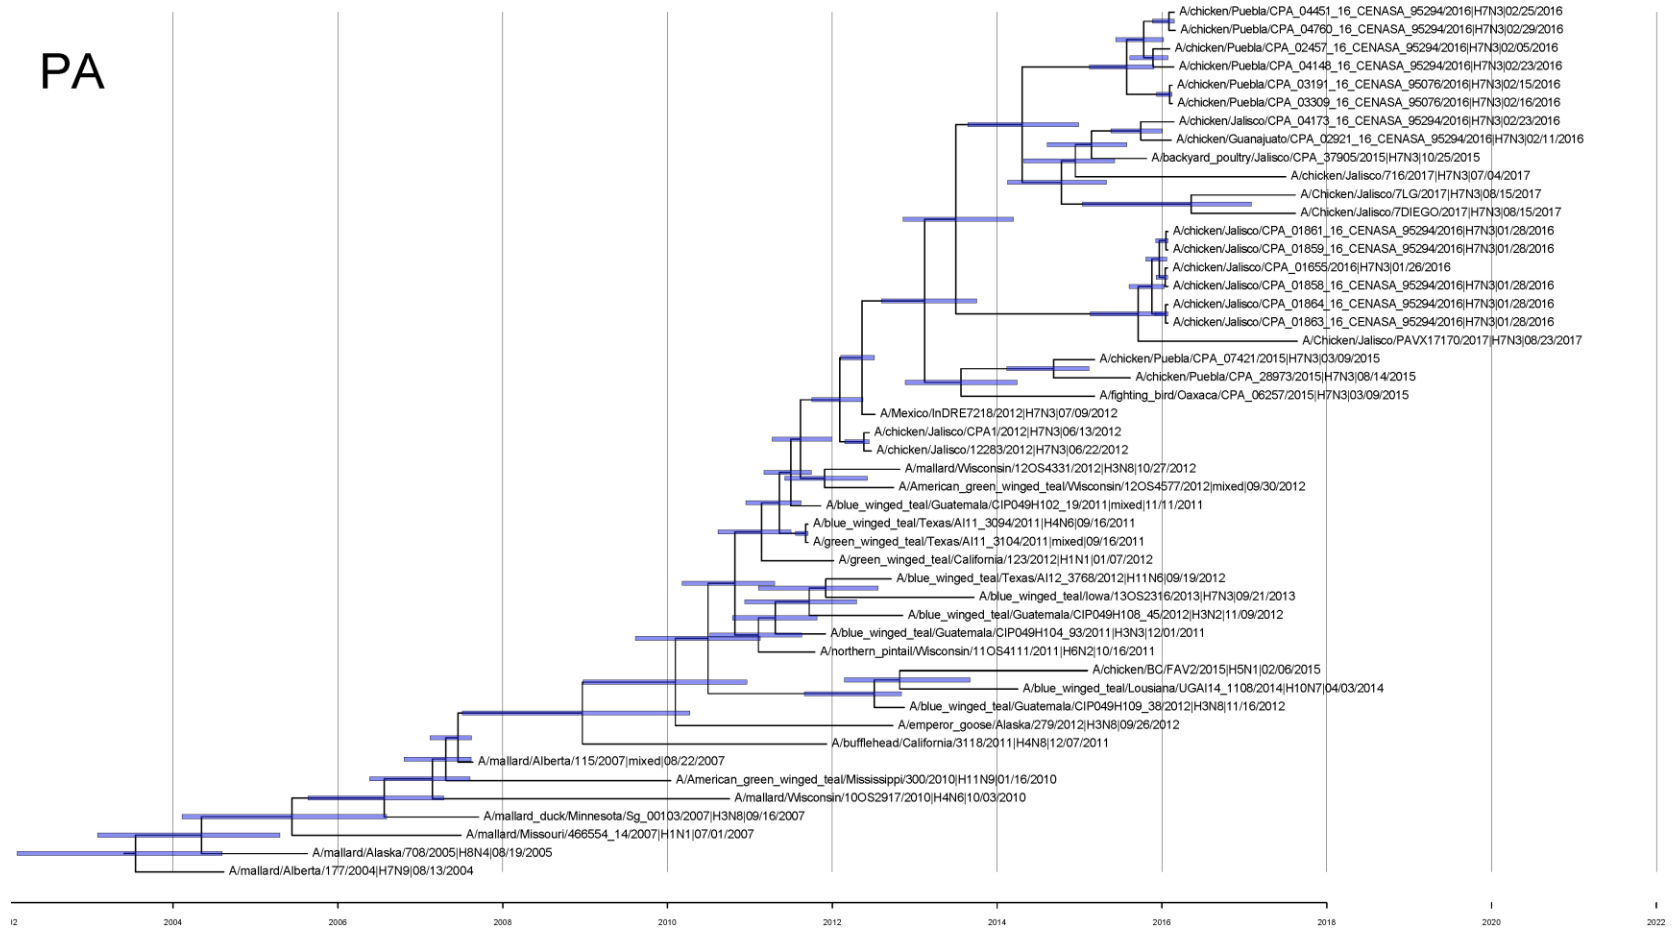

HA

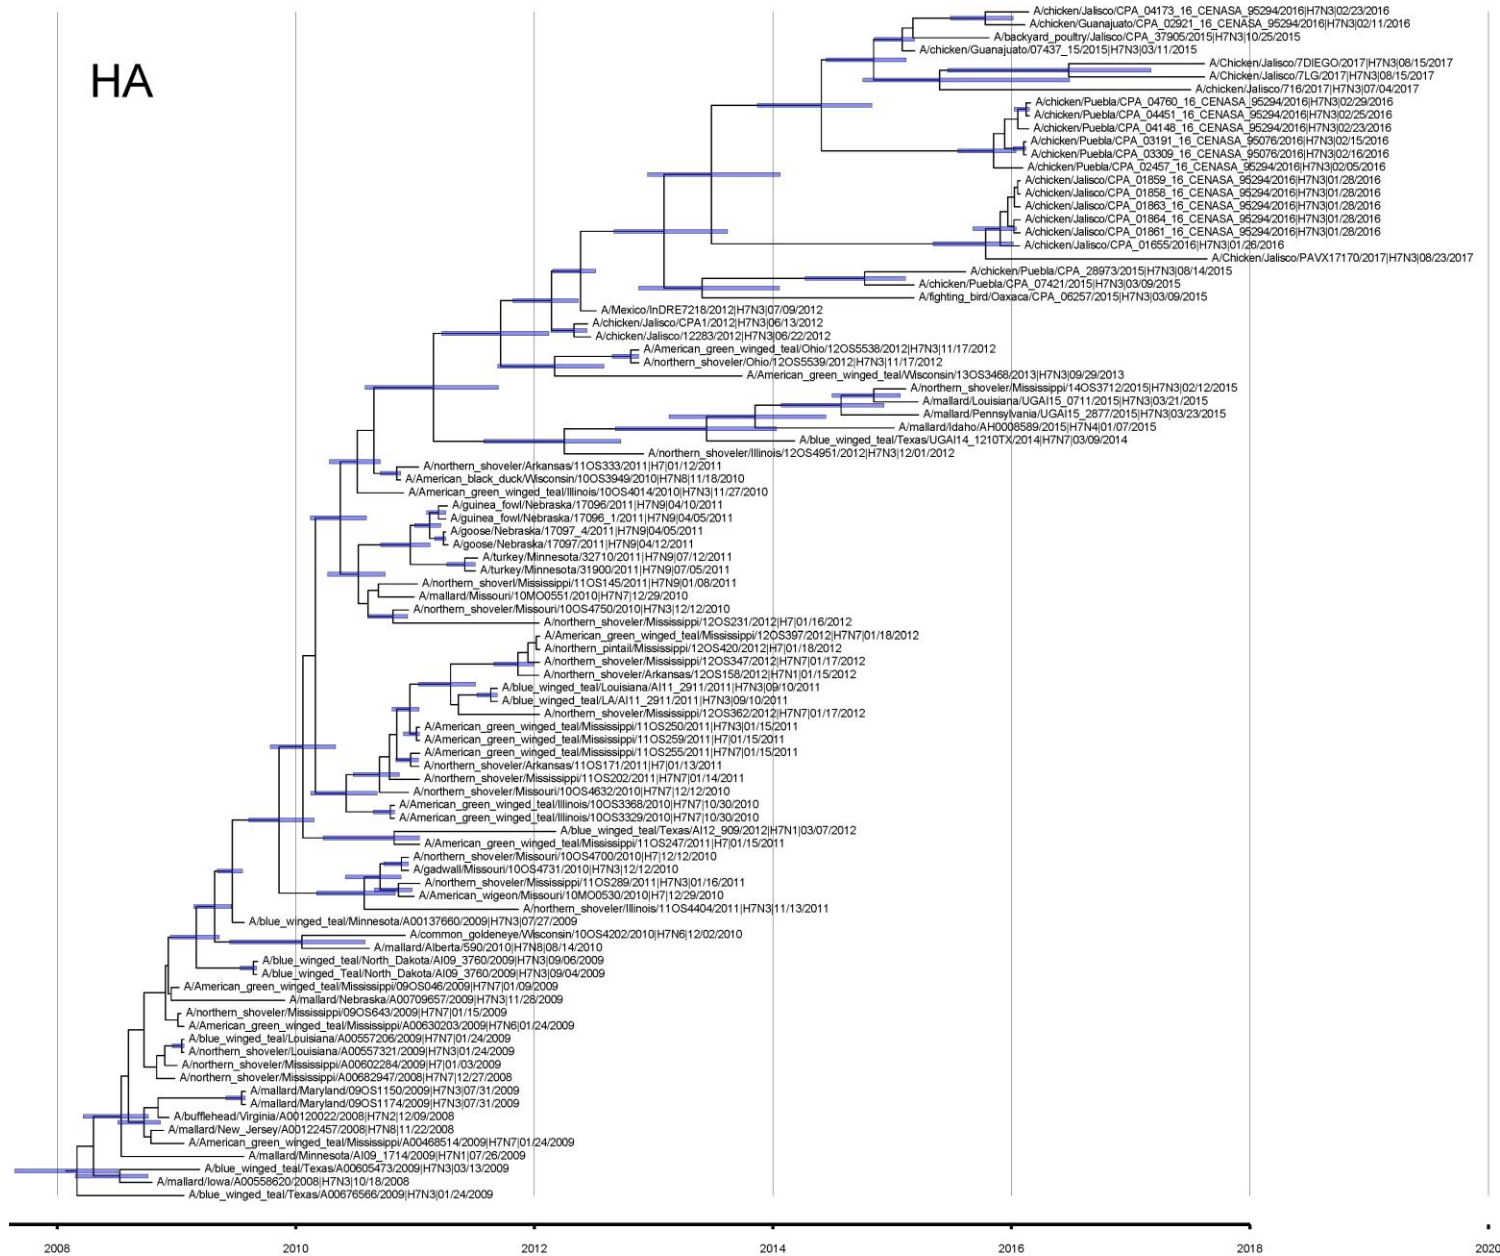

NP

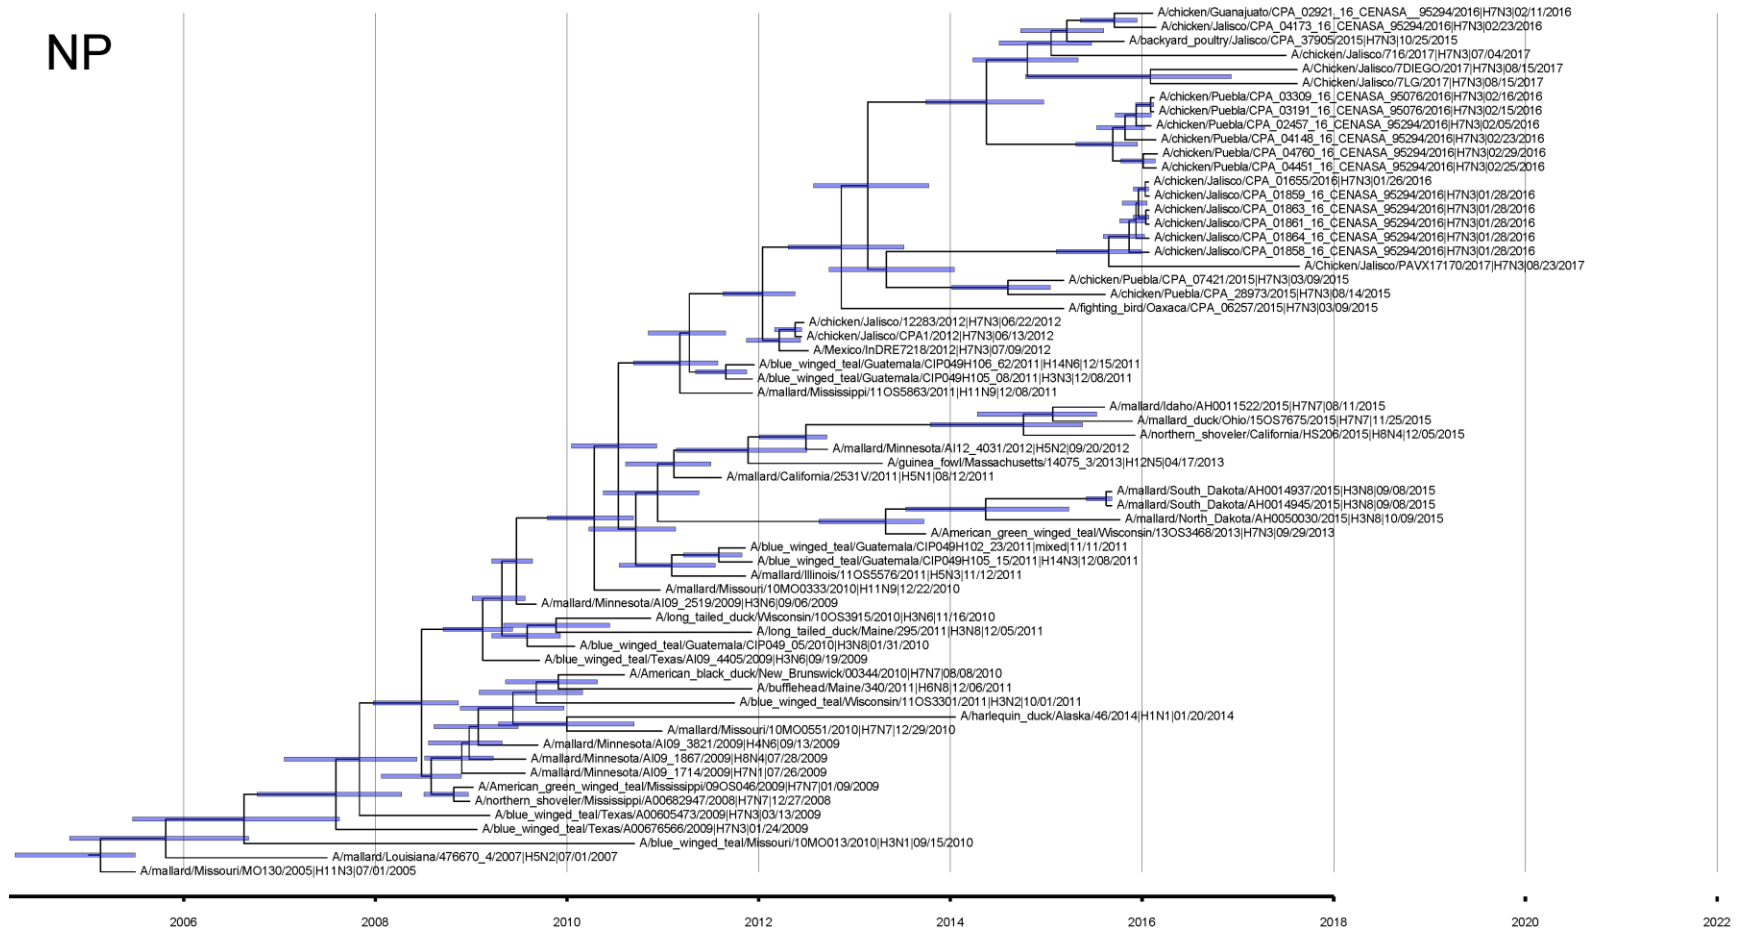

NA

2008 2010 2012 2014 2016 2018 2020

A/northern\_shoveler/California/JN770/2008|H10N3|12/06/2006

A/northern\_shoveler/Utah/A00374996/2007|H7N3|12/15/2007

A/green\_winged\_teal/Mexico\_Sonora/701/2008|H11N3|12/13/2008

A/northern\_pintail/Texas/A00466052/2009|H7N3|01/18/2009

A/mallard/Iowa/A00558620/2008|H7N3|10/18/2008

A/American\_green\_winged\_teal/Texas/A00604024/2009|H7N3|02/03/2009

A/American\_green\_winged\_teal/Texas/A00604032/2009|H7N3|02/03/2009

A/mallard/Nebraska/A00709657/2009|H7N3|11/28/2009

A/blue\_winged\_teal/Texas/A00676566/2009|H7N3|01/24/2009

A/blue\_winged\_teal/Illinois/100S3343/2010|H2N3|10/30/2010

A/blue\_winged\_teal/Guatemala/CIP049H098\_32/2010|H5N3|11/19/2010

A/blue\_winged\_teal/Chile/11/2014|H7N3|04/24/2014

A/blue\_winged\_teal/Chile/10/2014|H7N3|04/17/2014

A/blue\_winged\_teal/Chile/12/2014|H7N3|04/26/2014

A/blue\_winged\_teal/Guatemala/CIP049H105\_05/2011|H5N3|12/08/2011

A/blue\_winged\_teal/TX/AI12\_614/2012|H10N3|03/05/2012

A/mallard/Mississippi/120S445/2012|H10N3|01/18/2012

A/northern\_shoveler/Guatemala/CIP049H104\_69/2011|H11N3|12/01/2011

A/chicken/Jalisco/CPA1/2012|H7N3|06/13/2012

A/chicken/Jalisco/12283/2012|H7N3|06/22/2012

A/Mexico/InDRE7218/2012|H7N3|07/09/2012

A/fighting\_bird/Oaxaca/CPA\_06257/2015|H7N3|03/09/2015

A/chicken/Puebla/CPA\_07421/2015|H7N3|03/09/2015

A/chicken/Puebla/CPA\_28973/2015|H7N3|08/14/2015

A/chicken/Jalisco/PAVX17170/2017|H7N3|08/23/2017

A/chicken/Jalisco/CPA\_01655/2016|H7N3|01/26/2016

A/chicken/Jalisco/CPA\_01858\_16\_CENASA\_95294/2016|H7N3|01/28/2016

A/chicken/Jalisco/CPA\_01863\_16\_CENASA\_95294/2016|H7N3|01/28/2016

A/chicken/Jalisco/CPA\_01864\_16\_CENASA\_95294/2016|H7N3|01/28/2016

A/chicken/Jalisco/CPA\_01861\_16\_CENASA\_95294/2016|H7N3|01/28/2016

A/chicken/Jalisco/CPA\_01859\_16\_CENASA\_95294/2016|H7N3|01/28/2016

A/Chicken/Jalisco/7DIEGO/2017|H7N3|08/15/2017

A/Chicken/Jalisco/7LG/2017|H7N3|08/15/2017

A/Chicken/Jalisco/716/2017|H7N3|07/04/2017

A/backyard\_poultry/Jalisco/CPA\_37905/2015|H7N3|10/25/2015

A/chicken/Jalisco/CPA\_04173\_16\_CENASA\_95294/2016|H7N3|02/23/2016

A/chicken/Guanajuato/CPA\_02921\_16\_CENASA\_95294/2016|H7N3|02/11/2016

A/chicken/Puebla/CPA\_03191\_16\_CENASA\_95076/2016|H7N3|02/15/2016

A/chicken/Puebla/CPA\_03309\_16\_CENASA\_95076/2016|H7N3|02/16/2016

A/chicken/Puebla/CPA\_04451\_16\_CENASA\_95294/2016|H7N3|02/25/2016

A/chicken/Puebla/CPA\_02457\_16\_CENASA\_95294/2016|H7N3|02/05/2016

A/chicken/Puebla/CPA\_04148\_16\_CENASA\_95294/2016|H7N3|02/23/2016

A/chicken/Puebla/CPA\_02760\_16\_CENASA\_95294/2016|H7N3|02/29/2016

M

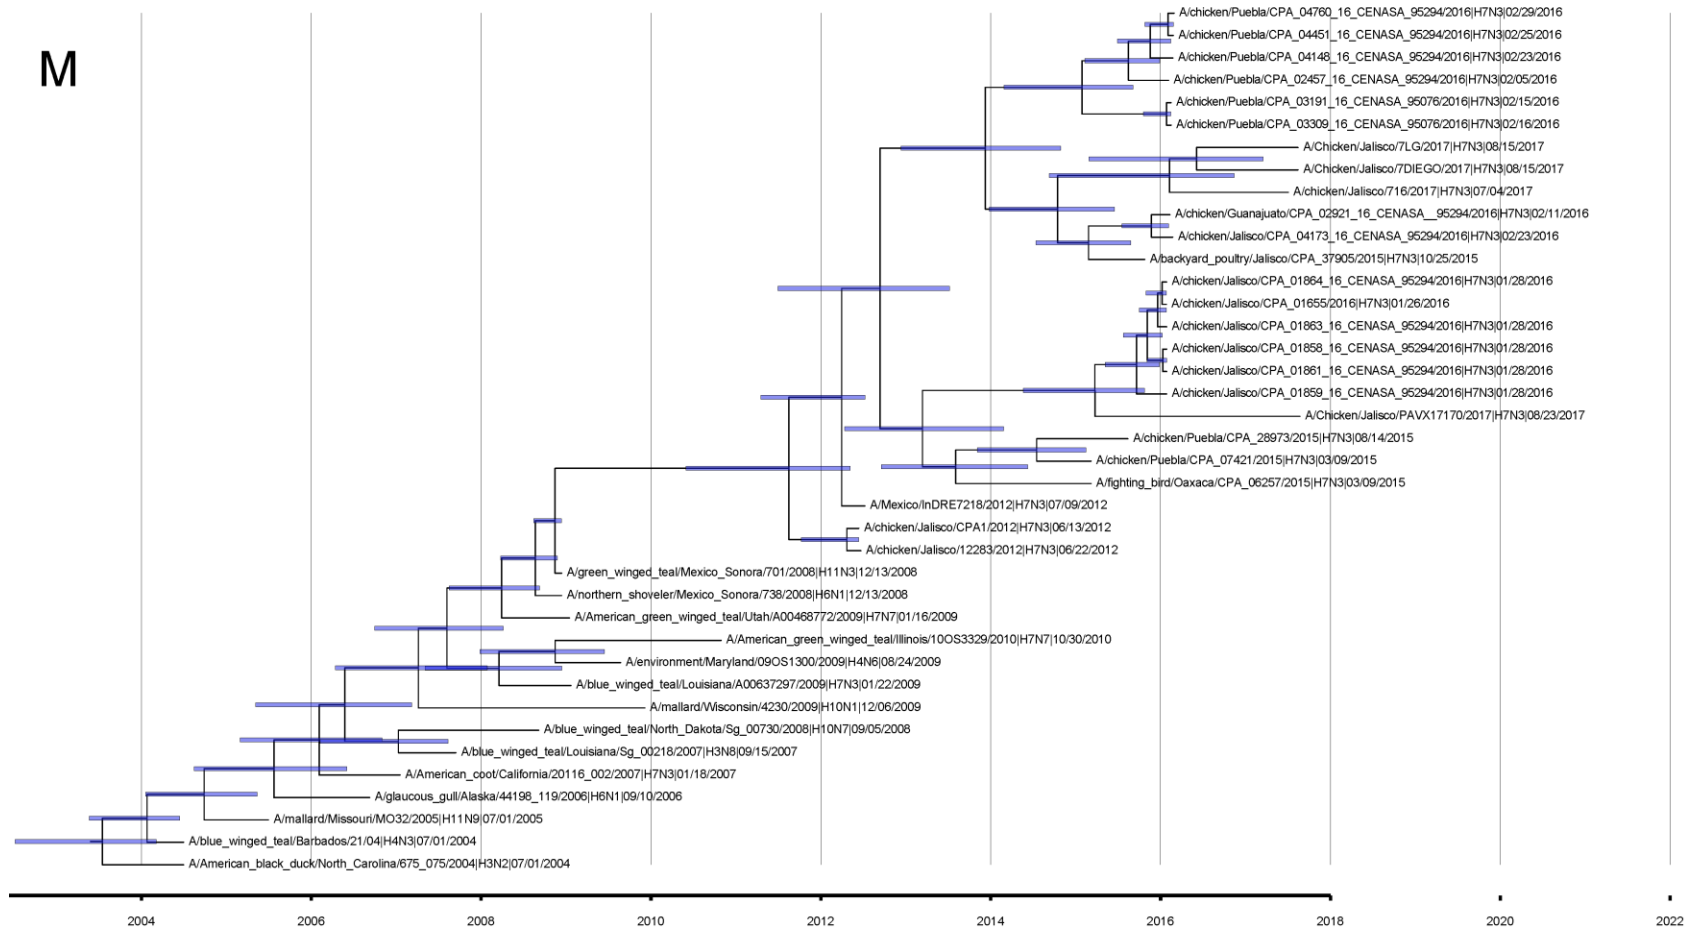

NS

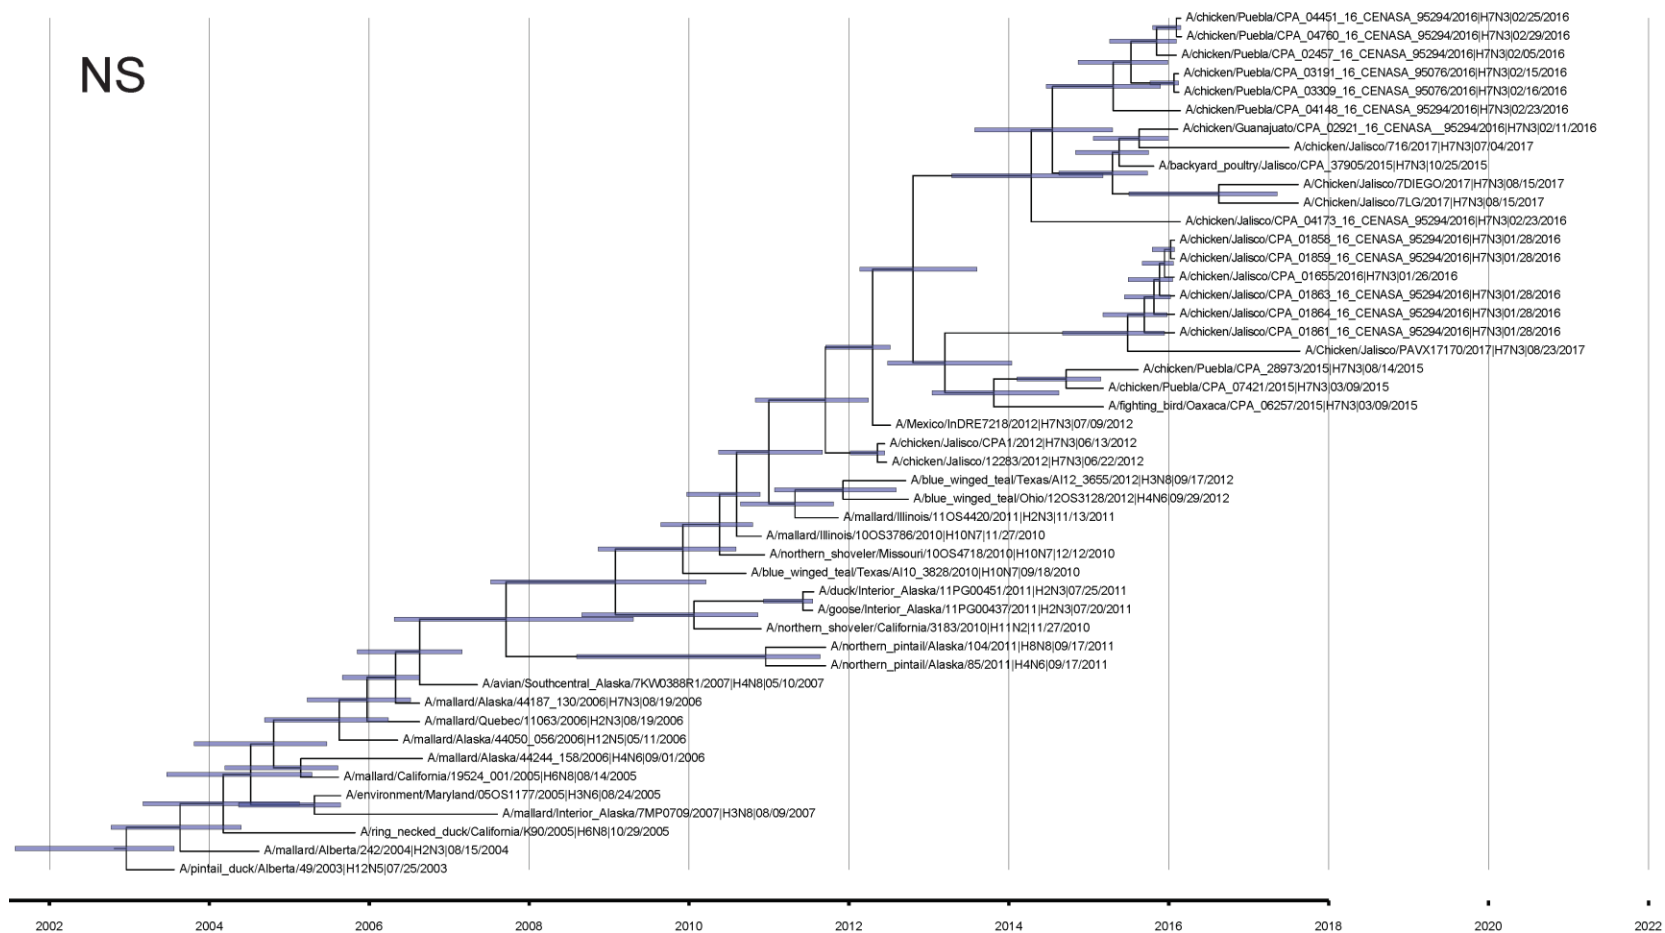

Supplement: S2 (10.1371/journal.pone.0222457.s002) [file journal.pone.0222457.s002]
